# Supplementary material
Source: PubMed Central journal article supplement (PMC6028292)

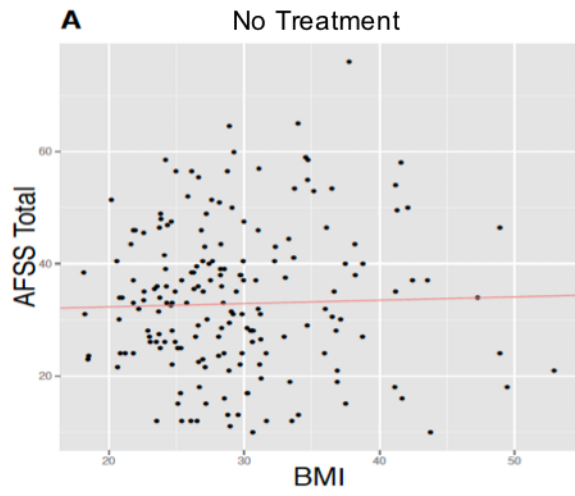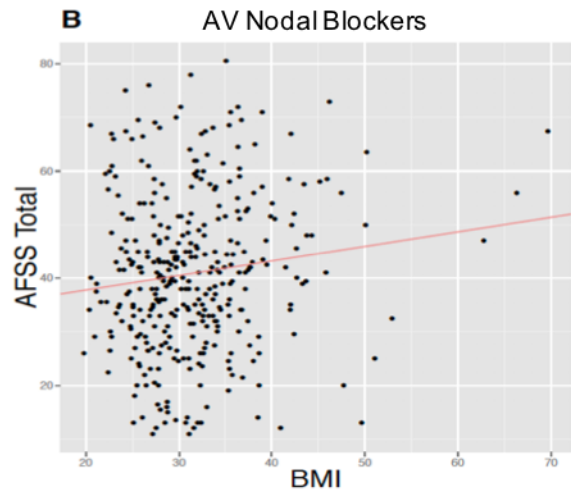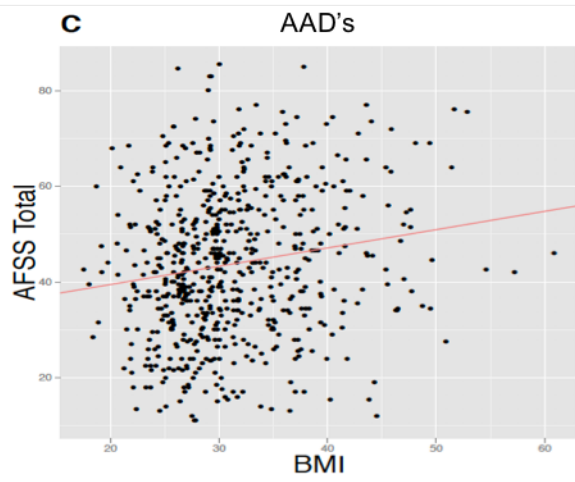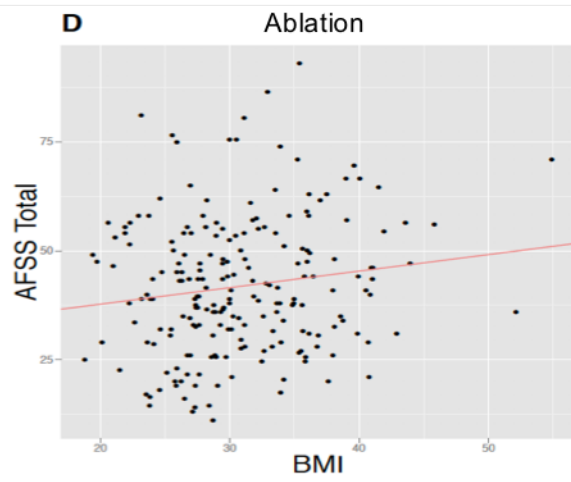

Supplement: NIHMS968330-supplement.pdf [file NIHMS968330-supplement.pdf]
